# Supplementary material for: In Silico Analysis of Seven PCR Markers Developed from the CHD1, NIPBL and SPIN Genes Followed by Laboratory Testing Shows How to Reliably Determine the Sex of Musophagiformes Species
Source: MDPI journal article supplement (doi:10.3390/genes13050932), 2022-05-23
Supplement: s1 [file s1]

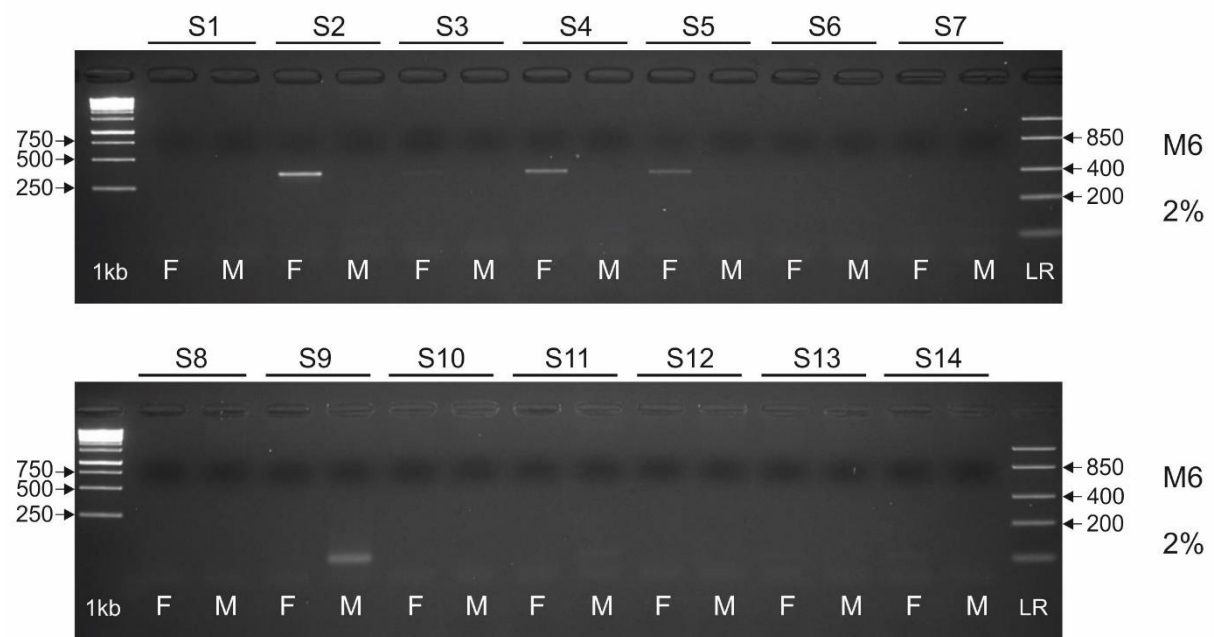

**Figure S2.** Patterns of the PCR products representing M6 marker obtained for male (M) and female (F) individuals of fourteen turaco species (S1 – S14, see Table 1). The amplicons were resolved in 2% agarose gel. Lane 1kb - GeneRuler 1 kb DNA Ladder (Thermo Scientific). Lane LR - FastRuler Low Range DNA Ladder (Thermo Scientific).
