# Supplementary material for: In Silico Analysis of Seven PCR Markers Developed from the CHD1, NIPBL and SPIN Genes Followed by Laboratory Testing Shows How to Reliably Determine the Sex of Musophagiformes Species
Source: Genes (Basel). 2022 May 23;13(5):932. doi: 10.3390/genes13050932 (PMC9140868; doi:10.3390/genes13050932)
Supplement: Supplementary file 1 [file genes-13-00932-s001.zip › Table S1.xlsx]

## Sheet: Arkusz1
	Table S1.	Number, position and length of exons and introns identified in CHD1, SPIN and NIPBL genes.
	Gene	Exons			Introns
		No.	Position	Lenght (bp)	No.	Position	Lenght (bp)
	CHD1	1	1 - 207	207	1	208 - 18,498	18.291
	CHD1	2	18,499 - 18,703	205	2	18,704 - 19,712	1.009
	CHD1	3	19,713 - 19,817	105	3	19,818 - 21,085	1.268
	CHD1	4	21,086 - 21,153	68	4	21,154 - 23,179	2.026
	CHD1	5	23,180 - 23,329	150	5	23,330 - 23,621	292
	CHD1	6	23,622 - 23,899	278	6	23,900 - 27,878	3.979
	CHD1	7	27,879 - 28,104	226	7	28,105 - 28,885	781
	CHD1	8	28,886 - 28,986	101	8	28,987 - 29,213	227
	CHD1	9	29,214 - 29,392	179	9	29,393 - 32,244	2.852
	CHD1	10	32,245 - 32,372	128	10	32,373 - 32,941	569
	CHD1	11	32,942 - 33,158	217	11	33,159 - 33,775	617
	CHD1	12	33,776 - 33,865	90	12	33,866 - 34,699	834
	CHD1	13	34,700 - 34,890	191	13	34,891 - 35,999	1.109
	CHD1	14	36,000 - 36,188	189	14	36,189 - 36,499	311
	CHD1	15	36,500 - 36,662	163	15	36,663 - 38,282	1.62
	CHD1	16	38,283 - 38,435	153	16	38,436 - 38,770	335
	CHD1	17	38,771 - 38,842	72	17	38,843 - 40,647	1.805
	CHD1	18	40,648 - 40,797	150	18	40,780 - 41,373	576
	CHD1	19	41,374 - 41,522	149	19	41,523 - 41,809	287
	CHD1	20	41,810 - 41,906	97	20	41,907 - 42,004	98
	CHD1	21	42,005 - 42,094	90	21	42,095 - 43,019	925
	CHD1	22	43,020 - 43,196	177	22	43,197 - 43,381	185
	CHD1	23	43,382 - 43,542	161	23	43,543 - 44,863	1.321
	CHD1	24	44,864 - 44,905	42	24	44,906 - 45,609	704
	CHD1	25	45,610 - 45,740	131	25	45,741 - 46,167	407
	CHD1	26	46,168 - 46,286	139	26	46,287 - 47,009	723
	CHD1	27	47,010 - 47,160	151	27	47,161 - 48,126	966
	CHD1	28	48,127 - 48,249	123	28	48,250 - 48,594	645
	CHD1	29	48,595 - 48,732	138	29	48,733 - 51,066	2.334
	CHD1	30	51,067 - 51,309	243	30	51,310 - 51,737	428
	CHD1	31	51,738 - 51,878	141	31	51,879 - 54,043	2.165
	CHD1	32	54,044 - 54,222	179	32	54,223 - 56,037	1.815
	CHD1	33	56,038 - 56,134	97	33	53,135 - 56,345	211
	CHD1	34	56,346 - 56,403	58	34	56,404 - 57,311	908
	CHD1	35	57,312 - 57,522	211	35	57,523 - 57,722	200
	CHD1	36	57,723 - 59,293	1.571
	SPIN	1	1 - 52	52	1	53 - 14,509	14.457
	SPIN	2	14,510 - 14,558	49	2	14,559 - 24,084	9.526
	SPIN	3	24,085 - 24,338	254	3	24,339 - 25,348	1.01
	SPIN	4	25,349 - 25,582	234	4	25,583 - 28,073	2.491
	SPIN	5	28,074 - 31,830	3.757
	NIPBL	1	1 - 152	152	1	153 - 5,268	5.116
	NIPBL	2	5,269 - 5,434	166	2	5,435 - 6,590	1.156
	NIPBL	3	6,591 - 6,722	132	3	6,723 - 12,565	5.843
	NIPBL	4	12,566 - 12,664	99	4	12,665 - 14,288	1.624
	NIPBL	5	14,289 - 14,440	152	5	14,441 - 15,469	1.029
	NIPBL	6	15,470 - 15,631	162	6	15,632 - 20,424	4.793
	NIPBL	7	20,425 - 20,518	94	7	20,519 - 29,506	8.988
	NIPBL	8	29,507 - 30,138	632	8	30,139 - 43,210	13.072
	NIPBL	9	43,211 - 44,796	1.586	9	44,797 - 58,669	13.873
	NIPBL	10	58,670 - 58,849	180	10	58,850 - 62,787	3.938
	NIPBL	11	62,788 - 62,985	198	11	62,986 - 63,171	186
	NIPBL	12	63,172 - 63,242	71	12	63,243 - 63,327	85
	NIPBL	13	63,328 - 63,418	91	13	63,419 - 64,631	1.213
	NIPBL	14	64,632 - 64,734	103	14	64,735 - 66,319	1.585
	NIPBL	15	66,320 - 66,406	87	15	66,407 - 67,862	1.456
	NIPBL	16	67,863 - 68,096	234	16	68,097 - 68,820	724
	NIPBL	17	68,821 - 68,973	153	17	68,974 - 69,774	801
	NIPBL	18	69,775 - 69,854	80	18	69,855 - 70,872	1.018
	NIPBL	19	70,873 - 70,973	101	19	70,974 - 72,462	1.489
	NIPBL	20	72,463 - 72,601	139	20	72,602 - 72,807	206
	NIPBL	21	72,808 - 72,890	83	21	72,891 - 73,916	1.026
	NIPBL	22	73,917 - 74,049	133	22	74,050 - 74,969	920
	NIPBL	23	74,970 - 75,111	142
