# Supplementary material for: In Silico Analysis of Seven PCR Markers Developed from the CHD1, NIPBL and SPIN Genes Followed by Laboratory Testing Shows How to Reliably Determine the Sex of Musophagiformes Species
Source: Genes (Basel). 2022 May 23;13(5):932. doi: 10.3390/genes13050932 (PMC9140868; doi:10.3390/genes13050932)
Supplement: Supplementary file 1 [file genes-13-00932-s001.zip › Table S2.xlsx]

## Sheet: Arkusz1
		Table S2. Identity of sequences homologous to the exons and introns of the Tauraco erythrolophus CHD1-Z gene, that were identified within Scaffold 37 or the W chromosome of this species.
				Exons						Introns
				Scaffold 37 - WOXW01000076.1			W chromosome - WOXW01000067.1			Scaffold 37 - WOXW01000076.1			W chromosome - WOXW01000067.1
				No.	Query cover %	Identity %	No.	Query cover %	Identity %	No.	Query cover %	Identity %	No.	Query cover %	Identity %
				1	−	−	1	−	−	1	10	92.32	1	16	92.89
				2	−	−	2	−	−	2	−	−	2	−	−
				3	−	−	3	−	−	3	−	−	3	−	−
				4	−	−	4	−	−	4	36	69.71	4	−	−
				5	100	95.33	5	−	−	5	−	−	5	−	−
				6	100	83.45	6	−	−	6	−	−	6	−	−
				7	100	94.25	7	−	−	7	96	73.07	7	−	−
				8	100	94.06	8	−	−	8	−	−	8	−	−
				9	100	94.41	9	−	−	9	82	82.32	9	80	84.3
				10	98	96.03	10	−	−	10	−	−	10	−	−
				11	100	94.93	11	−	−	11	74	78.01	11	−	−
				12	100	95.56	12	−	−	12	100	66.78	12	−	−
				13	100	92.67	13	−	−	13	39	70.19	13	−	−
				14	100	95.24	14	−	−	14	−	−	14	−	−
				15	100	95.71	15	−	−	15	63	74.16	15	−	−
				16	100	94.12	16	−	−	16	−	−	16	−	−
				17	100	95.83	17	−	−	17	65	68.26	17	−	−
				18	100	94.67	18	−	−	18	96	69.26	18	−	−
				19	100	94.63	19	−	−	19	100	71.19	19	−	−
				20	100	92.78	20	−	−	20	−	−	20	−	−
				21	100	95.56	21	−	−	21	49	76.92	21	−	−
				22	100	94.92	22	−	−	22	21	90	22	−	−
				23	100	91.3	23	−	−	23	68	73.72	23	−	−
				24	100	97.62	24	−	−	24	19	85	24	−	−
				25	100	92.37	25	−	−	25	74	75.16	25	−	−
				26	100	95.68	26	−	−	26	84	71.21	26	−	−
				27	100	96.69	27	−	−	27	68	74.55	27	−	−
				28	100	91.06	28	−	−	28	100	72.99	28	−	−
				29	−	−	29	−	−	29	49	75.92	29	−	−
				30	93	92.98	30	−	−	30	100	74.33	30	−	−
				31	100	91.49	31	−	−	31	68	74.53	31	−	−
				32	100	93.85	32	−	−	32	91	73.15	32	−	−
				33	100	95.88	33	−	−	33	100	74.31	33	−	−
				34	100	96.55	34	−	−	34	75	73	34	−	−
				35	100	92.89	35	−	−	35	88	81.22	35	−	−
				36	92	89.95	36	−	−
