# Supplementary material for: In Silico Analysis of Seven PCR Markers Developed from the CHD1, NIPBL and SPIN Genes Followed by Laboratory Testing Shows How to Reliably Determine the Sex of Musophagiformes Species
Source: Genes (Basel). 2022 May 23;13(5):932. doi: 10.3390/genes13050932 (PMC9140868; doi:10.3390/genes13050932)
Supplement: Supplementary file 1 [file genes-13-00932-s001.zip › Table S3.xlsx]

## Sheet: Arkusz1
Table S3. Identity of sequences homologous to the exons and introns of the Tauraco erythrolophus NIPBL-Z gene, that were identified within the W chromosome of this species.
		Exons			Introns
			Query cover %	Identity %		Query cover %	Identity %
		1	100	98.03	1	89	79.78
		2	100	98.8	2	100	76.42
		3	100	97.73	3	94	77.76
		4	100	95.96	4	87	82.59
		5	100	98.03	5	99	74.72
		6	100	96.91	6	74	99.41
		7	100	94.68	7	90	82.95
		8	100	98.73	8	96	82.2
		9	100	90.42	9	89	81.15
		10	100	98.89	10	86	82.83
		11	100	94.95	11	−	−
		12	100	98.59	12	94	88.75
		13	100	94.51	13	88	81.4
		14	96	97.98	14	99	83.46
		15	100	94.25	15	90	76.52
		16	100	95.73	16	40	79.93
		17	99	98.03	17	100	82.61
		18	100	96.25	18	71	84.59
		19	99	96	19	95	83.94
		20	100	92.81	20	62	84.85
		21	100	97.59	21	100	81.06
		22	100	96.99	22	100	81.34
		23	100	97.89
